# Supplementary material for: Development of a Recombinant Adeno-Associated Virus Vaccine Expressing PEDV S1 Protein: Enhanced Humoral and Cellular Immunity with Superior Neonatal Protection
Source: Research Square preprint supplement (doi:10.21203/rs.3.rs-6224876/v1), 2025-05-07
Supplement: Supplementary file 1 [file b2a4f1791d794d9fb6b749bc.docx]

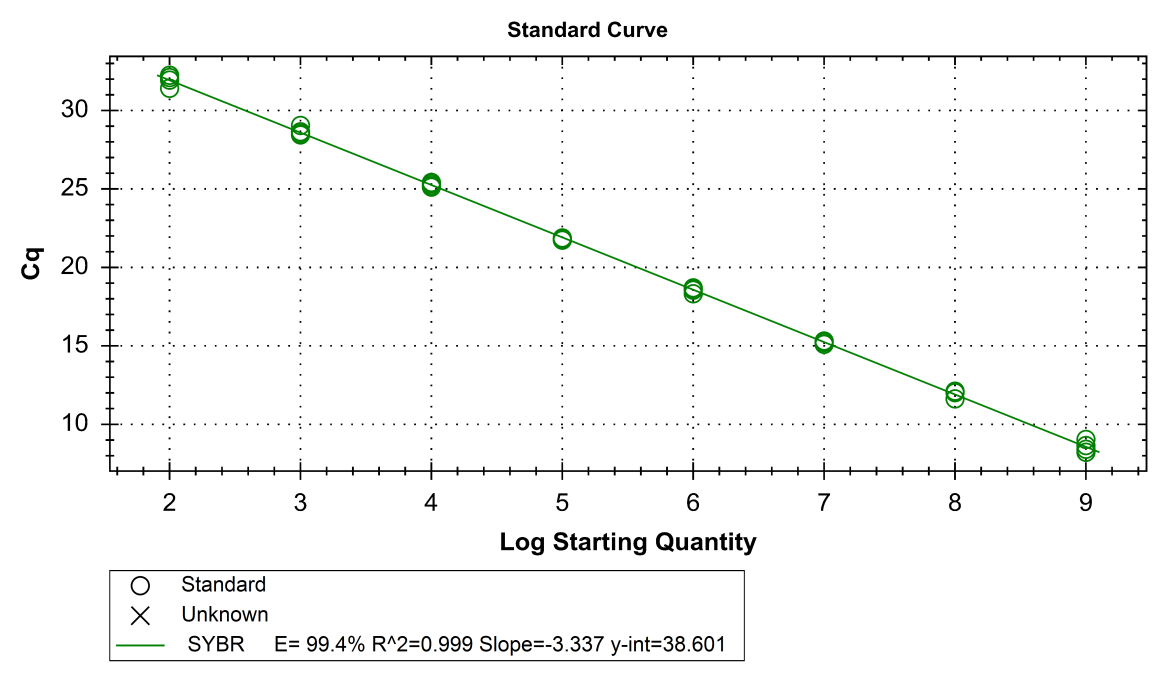


**Figure.1** The standard curves of rAAV-CMV-PEDV S1 virus

Y= -3.221log10N+36.441 (E= 104.4%, R2= 0.999)


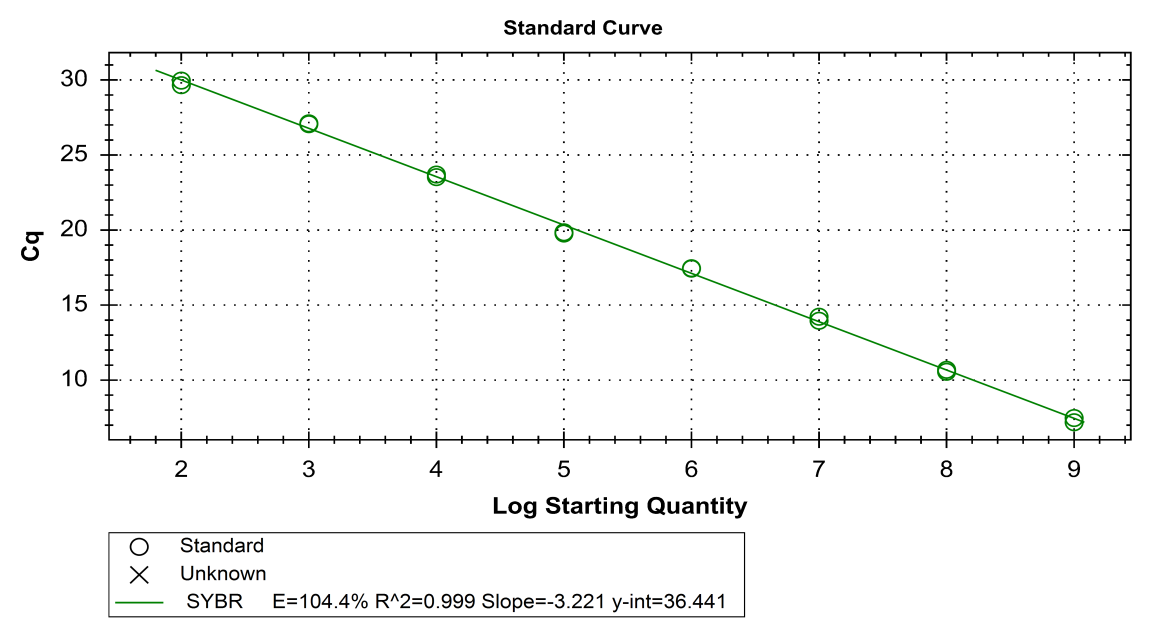


**Figure.2** The standard curves of PEDV

Y= -3.337log10N+38.601 (E=99.4%, R2=0.999)

| **Item** | **Metric** | **Score** | **Item** | **Metric** | **Score** |
| --- | --- | --- | --- | --- | --- |
| Feeding situation | Normal | 2 | Fecal morphology | Normal | 3 |
| Little | 1 | Liquid-solid state | 2 |
| None | 0 | Caked/Liquid | 1 |
| Drinking situation | Normal | 2 | Mental condition | Normal | 1 |
| Little | 1 | Depressed/Gitated | 0 |

**Table.1** Comprehensive Scoring Table for the Feeding, Drinking, Mental State and Fecal Morphology of Pregnant Sows

| **Diarrhea Severity** | **Fecal Appearance Description** | **Score** |
| --- | --- | --- |
| Normal | Strip - shaped or granular | 3 |
| Mild diarrhea | Formed, soft feces | 2 |
| Moderate diarrhea | Viscous, no separation of feces and water, loose feces | 1 |
| Severe diarrhea | Liquid, unformed | 0 |

**Table. 2** Score of Diarrhea Severity in Piglets

| **Item** | **Index** | **Score** |
| --- | --- | --- |
| Score of Feed Intake | Normal feed intake | 2 |
| Small - amount feed intake | 1 |
| No feed intake | 0 |

**Table. 3** Score of Feed Intake in Piglets
